# Supplementary material
Source: PubMed Central journal article supplement (PMC8330145)

**A****saliva spitting device**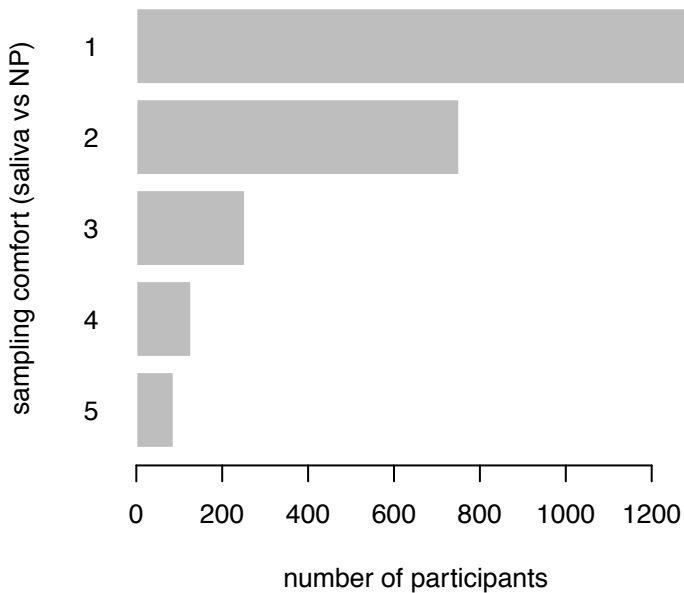**B****saliva spitting device**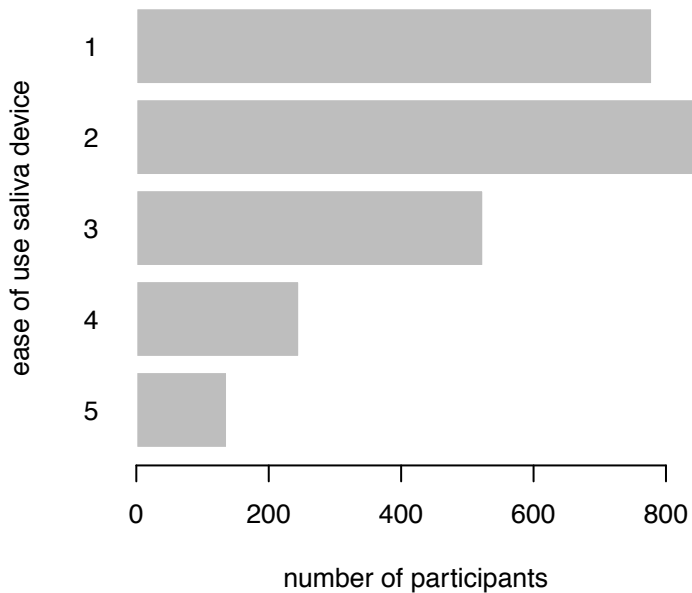**saliva swabbing device**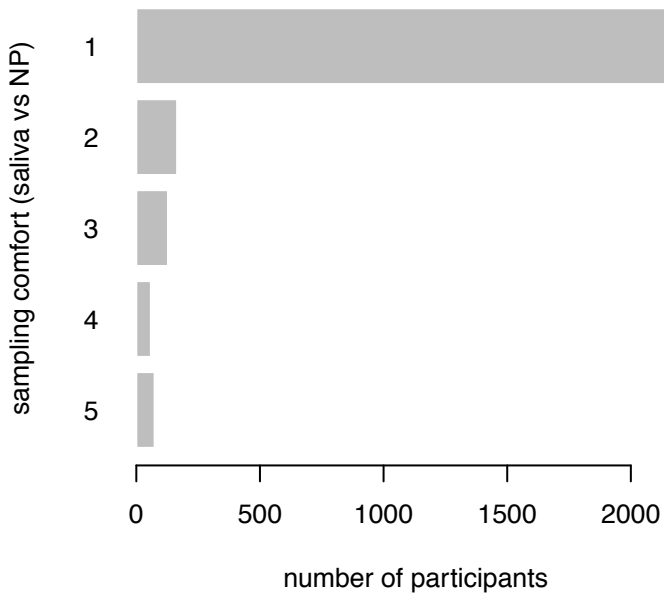**saliva swabbing device**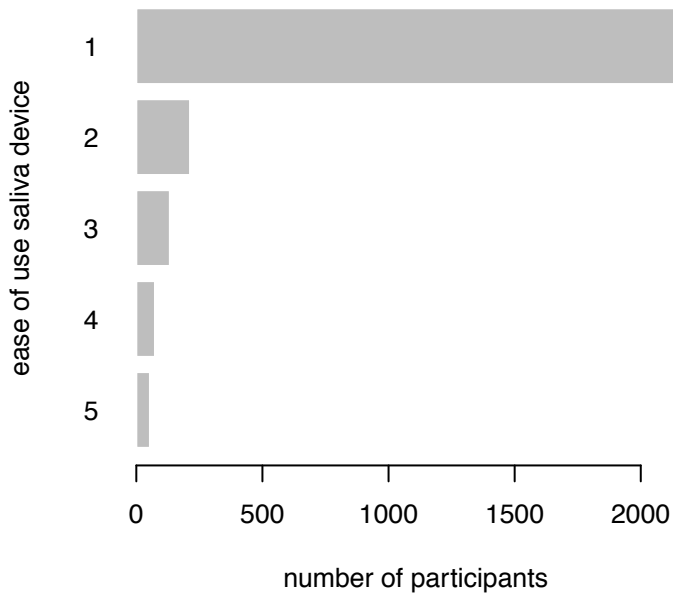

Supplement: mmc1.pdf [file mmc1.pdf]
