# Supplementary material
Source: PubMed Central journal article supplement (PMC8330145)

**A**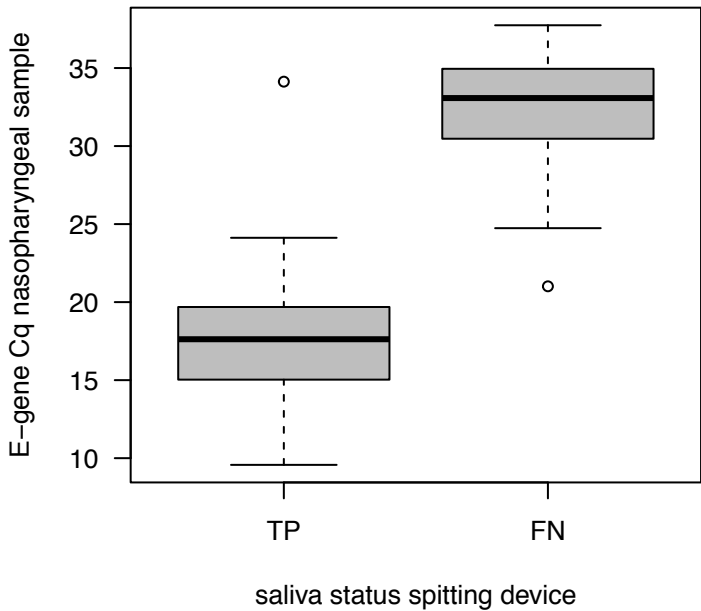**B**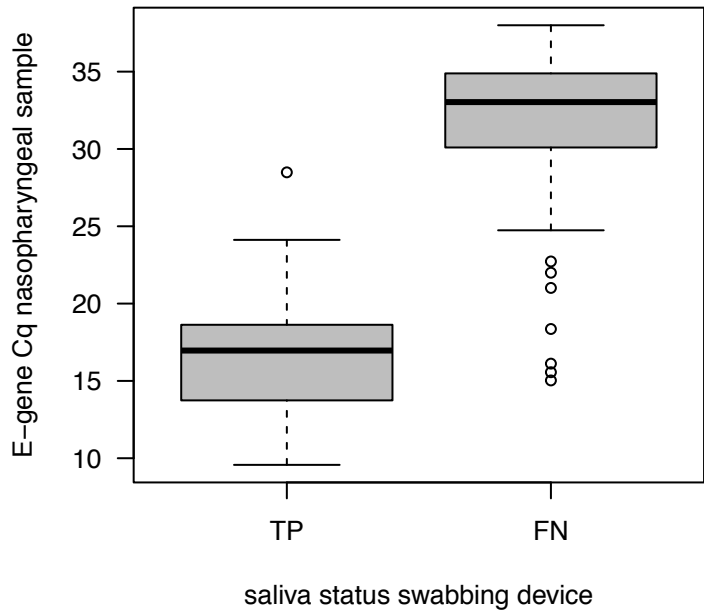

Supplement: mmc2.pdf [file mmc2.pdf]

**A****saliva spitting device**

overall sensitivity= 50%

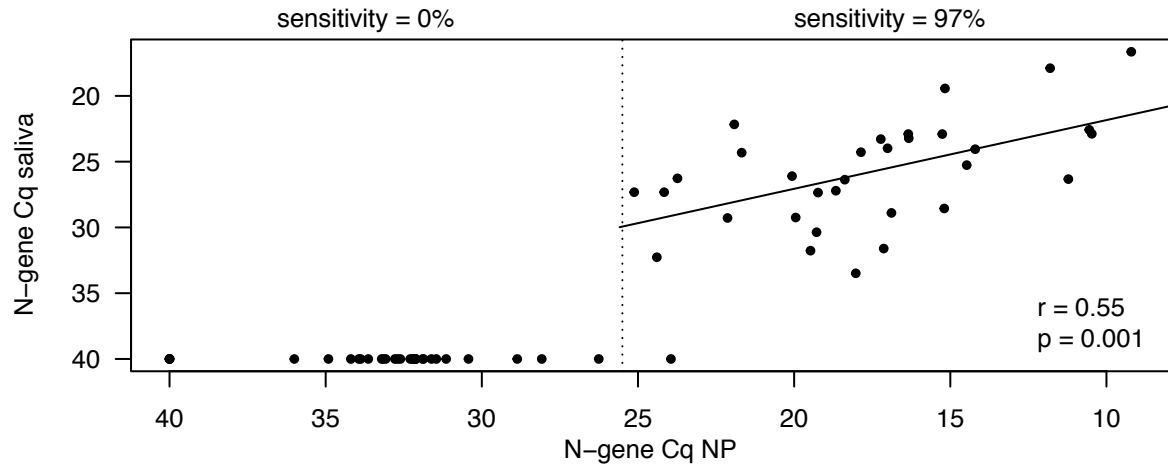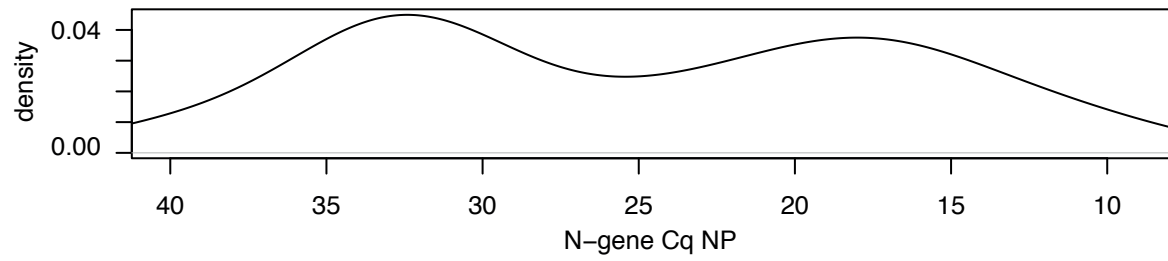**B****saliva swabbing device**

overall sensitivity= 30.5%

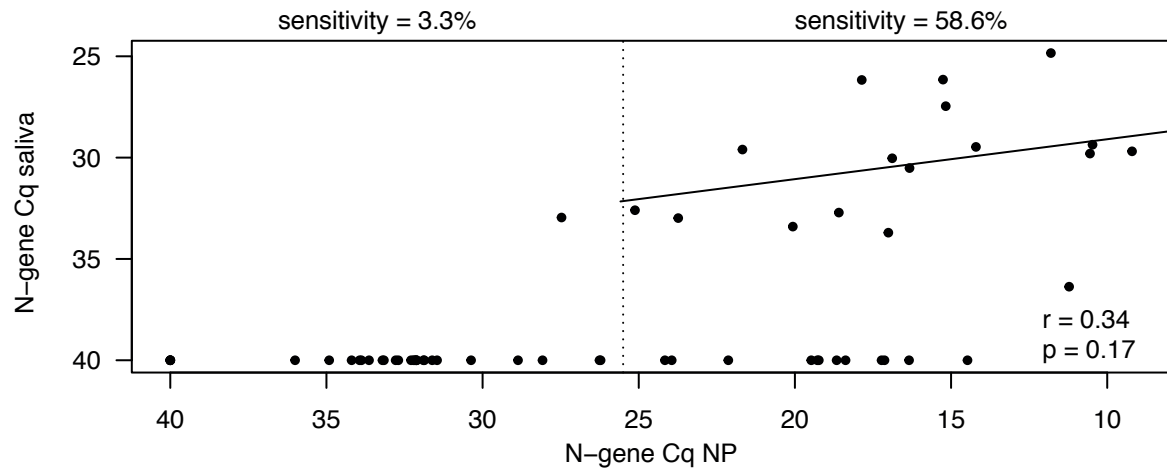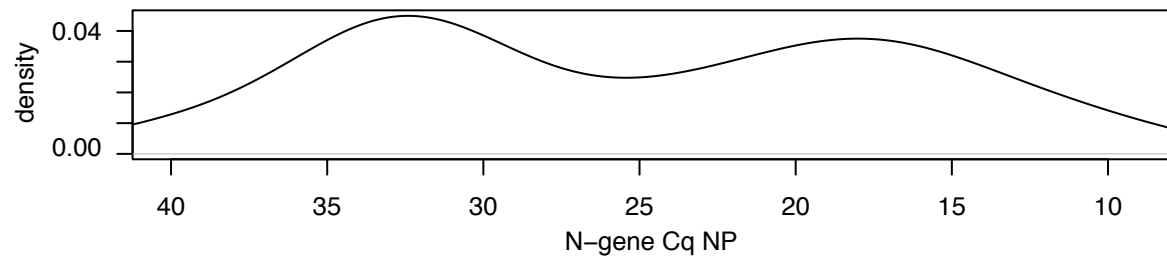

Supplement: mmc3.pdf [file mmc3.pdf]

**A****saliva spitting**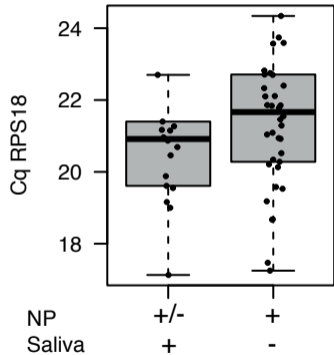**B****saliva swabbing**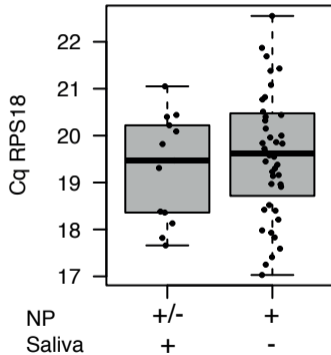**C****nasopharyngeal swab**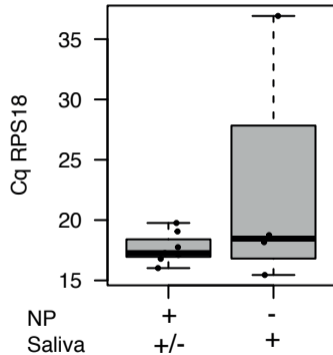

Supplement: mmc4.pdf [file mmc4.pdf]
